# Similar cardiovascular outcomes in patients with diabetes and established or high risk for coronary vascular disease treated with dulaglutide with and without baseline metformin

Giulia Ferrannini <sup>1\*</sup>, Hertzfel Gerstein <sup>2</sup>, Helen Martina Colhoun <sup>3</sup>, Gilles R. Dagenais<sup>4</sup>, Rafael Diaz<sup>5</sup>, Leanne Dyal<sup>2</sup>, Mark Lakshmanan<sup>6</sup>, Linda Mellbin<sup>1</sup>, Jeffrey Probstfield <sup>7</sup>, Matthew Casey Riddle<sup>8</sup>, Jonathan Edward Shaw <sup>9</sup>, Alvaro Avezum<sup>10</sup>, Jan Neil Basile<sup>11</sup>, William C. Cushman<sup>12</sup>, Petr Jansky<sup>13</sup>, Mátyás Keltai<sup>14</sup>, Fernando Lanas <sup>15</sup>, Lawrence Alan Leiter <sup>16</sup>, Patricio Lopez-Jaramillo <sup>17</sup>, Prem Pais<sup>18</sup>, Valdis Pīrāgs<sup>19</sup>, Nana Pogossova <sup>20</sup>, Peter Johann Raubenheimer <sup>21</sup>, Wayne Huey-Herng Sheu<sup>22</sup>, and Lars Rydén<sup>1</sup>

<sup>1</sup>Department of Medicine K2, Karolinska Institutet, Solnavägen 1, Stockholm SE171 77, Sweden; <sup>2</sup>Population Health Research Institute, McMaster University and Hamilton Health Sciences, 237 Barton Street East, Hamilton, ON L8L 2X2, Canada; <sup>3</sup>Institute of Genetics and Molecular Medicine, University of Edinburgh, Crewe Road, Edinburgh EH4 2XU, UK; <sup>4</sup>Department of Medicine, Institut Universitaire de Cardiologie et Pneumologie, Université Laval, Québec City, QC, Canada; <sup>5</sup>ECLA, Estudios Clínicos Latinoamérica, Instituto Cardiovascular de Rosario, Paraguay 160, S2000 Rosario, Santa Fe, Argentina; <sup>6</sup>Eli Lilly and Company, 893 Delaware St, Indianapolis, IN 46225, USA; <sup>7</sup>Department of Medicine, RR-512, Health Sciences Building, University of Washington, Box 356420, 1959 NE Pacific Street, Seattle, WA 98195-6420, USA; <sup>8</sup>Department of Medicine, Oregon Health & Science University, 3181 SW Sam Jackson Park Rd, Portland, OR 97239, USA; <sup>9</sup>Baker Heart and Diabetes Institute, 75 Commercial Rd, Melbourne VIC 3004, Australia; <sup>10</sup>Instituto Dante Pazzanese de Cardiologia and University Santo Amaro, Av. Dr. Dante Pazzanese, 500 - Vila Mariana, São Paulo - SP, 04012-909, Brazil; <sup>11</sup>Division of Cardiology, Medical University of South Carolina, 171 Ashley Ave, Charleston, SC 29425, USA; <sup>12</sup>Memphis Veterans Affairs Medical Center, Preventive Medicine Section, 1030 Jefferson Ave, Memphis, TN 38104, USA; <sup>13</sup>Department of Cardiovascular Surgery, University Hospital Motol, V Úvalu 84 150 06 Praha 5, Czech Republic; <sup>14</sup>Department of Cardiology, Semmelweis University, Hungarian Institute of Cardiology, Üllői út 26, 1085 Budapest, Hungary; <sup>15</sup>Department of Internal Medicine, Universidad de La Frontera, Francisco Salazar 1145, Temuco, Araucanía, Chile; <sup>16</sup>Department of Medicine, Li Ka Shing Knowledge Institute, St. Michael's Hospital, University of Toronto, 38 Shuter St, Toronto, ON M5B 1A6, Canada; <sup>17</sup>Masira Research Institute, Medical School, Universidad de Santander UDES, Calle 70 No 55-210 Bucaramanga, Colombia; <sup>18</sup>Division of Clinical Research and Training, St. John's Research Institute, 100 Feet Rd, John Nagar, Koramangala, Bengaluru, Karnataka 560034, India; <sup>19</sup>Department of Internal Medicine, Latvijas Universitāte, Raiņa bulvāris 19, Centra rajons, Rīga LV-1586, Latvia; <sup>20</sup>National Medical Research Center of Cardiology, Ulitsa Ostrovityanova, 1, Moscow 117997, Russian Federation; <sup>21</sup>Department of Medicine, University of Cape Town, Observatory, Cape Town 7925, South Africa; and <sup>22</sup>Department of Medicine, Taichung Veterans General Hospital, Rongguang Road, Puli Township, Nantou County, Taichung 54552, Taiwan

Received 1 June 2020; revised 27 July 2020; editorial decision 8 September 2020; accepted 8 September 2020; online publish-ahead-of-print 16 November 2020

See page 2574 for the editorial comment on this article (doi:10.1093/eurheartj/ehaa879)

## Objective

Recent European Guidelines for Diabetes, Prediabetes and Cardiovascular Diseases introduced a shift in managing patients with type 2 diabetes at high risk for or established cardiovascular (CV) disease by recommending GLP-1 receptor agonists and SGLT-2 inhibitors as initial glucose-lowering therapy. This is questioned since outcome trials of these drug classes had metformin as background therapy. In this *post hoc* analysis, the effect of dulaglutide on CV events was investigated according to the baseline metformin therapy by means of a subgroup analysis of the Researching Cardiovascular Events with a Weekly Incretin in Diabetes (REWIND) trial.

\* Corresponding author. Tel: +46 735806627, Fax: +46 8344964, Email: giulia.ferrannini@ki.se

Published on behalf of the European Society of Cardiology. All rights reserved. © The Author(s) 2020. For permissions, please email: journals.permissions@oup.com.

Research design and methods

Patients in REWIND ( $n = 9901$ ; women: 46.3%; mean age: 66.2 years) had type 2 diabetes and either a previous CV event (31%) or high CV risk (69%). They were randomized (1:1) to sc. dulaglutide (1.5 mg/weekly) or placebo in addition to standard of care. The primary outcome was the first of a composite of nonfatal myocardial infarction, nonfatal stroke, and death from cardiovascular or unknown causes. Key secondary outcomes included a microvascular composite endpoint, all-cause death, and heart failure. The effect of dulaglutide in patients with and without baseline metformin was evaluated by a Cox regression hazard model with baseline metformin, dulaglutide assignment, and their interaction as independent variables. Adjusted hazard ratios (HRs) and 95% confidence intervals (CIs) were estimated by a Cox regression model with adjustments for factors differing at baseline between people with vs. without metformin, identified using the backward selection.

Results

Compared to patients with metformin at baseline ( $n = 8037$ ; 81%), those without metformin ( $n = 1864$ ; 19%) were older and slightly less obese and had higher proportions of women, prior CV events, heart failure, and renal disease. The primary outcome occurred in 976 (12%) participants with baseline metformin and in 281 (15%) without. There was no significant difference in the effect of dulaglutide on the primary outcome in patients with vs. without metformin at baseline [HR 0.92 (CI 0.81–1.05) vs. 0.78 (CI 0.61–0.99); interaction  $P = 0.18$ ]. Findings for key secondary outcomes were similar in patients with and without baseline metformin.

Conclusion

This analysis suggests that the cardioprotective effect of dulaglutide is unaffected by the baseline use of metformin therapy.

Graphical Abstract

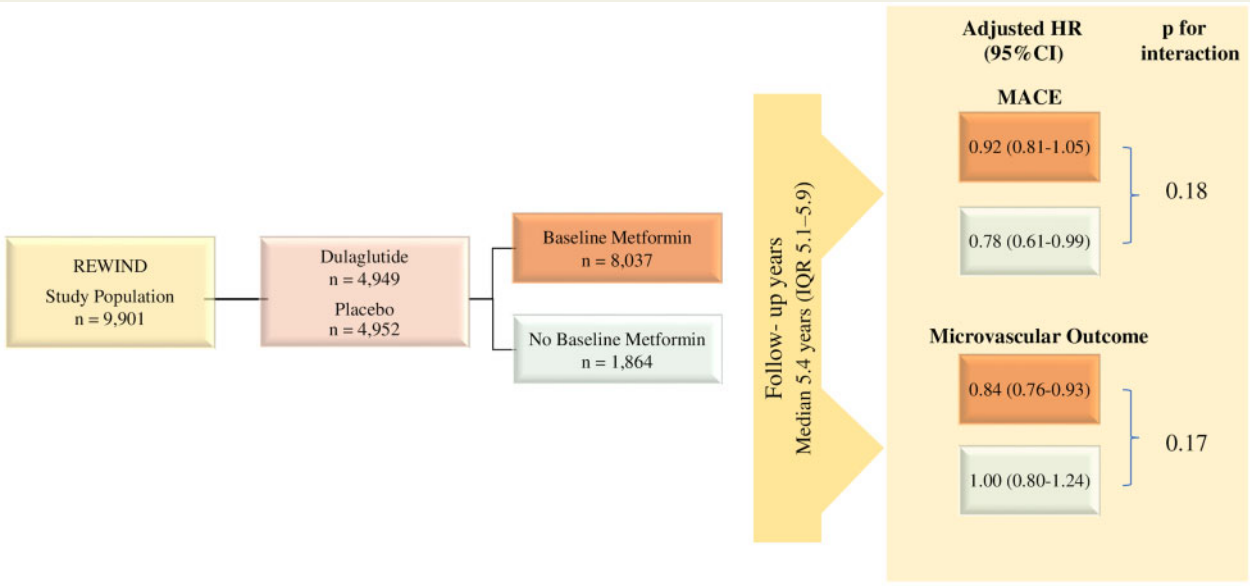

Keywords

Cardiovascular disease • GLP-1-based therapy • Metformin • Mortality • Morbidity

Introduction

Type 2 diabetes is an independent risk factor for cardiovascular morbidity and mortality, despite the use of therapies addressing traditional cardiovascular risk factors.<sup>1</sup> Cardiovascular outcome trials

(CVOTs) reported that several drugs belonging to the classes of glucagon-like peptide-1 receptor agonists (GLP-1 RAs) and sodium-glucose co-transporter 2 (SGLT-2) inhibitors reduced cardiovascular events in people who were also taking other cardioprotective medications. This resulted in recent European guideline recommendations

to use either of these agents as first-line glucose-lowering therapy in people with type 2 diabetes at high risk for or with established cardiovascular disease (CVD).<sup>2,3</sup>

The high prevalence of concomitant metformin use in participants in the outcome trials on GLP-1 RAs and SGLT-2 inhibitors has fuelled uncertainty regarding whether the cardiovascular benefits of these agents occur in both the presence and absence of metformin.<sup>4–11</sup> Therefore, whether the proven cardiovascular benefits of these new anti-hyperglycaemic drugs require concurrent metformin therapy remains unknown.<sup>2,12,13</sup>

In the Researching Cardiovascular Events with a Weekly Incretin in Diabetes (REWIND) trial, the GLP-1 RA dulaglutide reduced the risk of major adverse cardiovascular events (MACE, comprising non-fatal myocardial infarction or stroke and cardiovascular death) compared to placebo in people with type 2 diabetes and established CVD or multiple cardiovascular risk factors.<sup>11</sup> A sizeable proportion of the REWIND participants were without metformin therapy at the time of randomization, equally in the dulaglutide group and in the placebo group.<sup>11,14</sup> Analyses of the cardiovascular effects of dulaglutide in the presence and absence of baseline metformin treatment may help clinicians choose the optimal first-line type 2 diabetes glucose-lowering treatment for patients at high cardiovascular risk, both with and without established CVD.

This *post hoc* analysis of the REWIND trial tests the hypothesis that the effect of dulaglutide on cardiovascular events is unaffected by the use of baseline metformin therapy.

## Methods

### Participants

The REWIND trial (ClinicalTrials.gov number: NCT01394952) was a multicentre, randomized, double-blind, placebo-controlled trial, conducted at 371 sites in 24 countries as previously described in detail.<sup>14</sup> Eligible patients were  $\geq 50$  years old with type 2 diabetes,  $\text{HbA}_{1c} \leq 9.5\%$  ( $\leq 80$  mmol/mol), and  $\text{BMI} \geq 23$  kg/m<sup>2</sup> and were on stable treatment for at least 3 months with 0–2 glucose-lowering drugs, with or without basal insulin. The participants had either suffered a previous cardiovascular event or had multiple cardiovascular risk factors.<sup>14</sup> Exclusion criteria were an estimated glomerular filtration rate (eGFR)  $< 15$  mL/min/1.73 m<sup>2</sup>, a history of cancer within 5 years prior to inclusion, any episode of severe hypoglycaemia in the year prior to inclusion, a life expectancy below 1 year, a coronary or cerebrovascular event within the previous 2 months or planned revascularization.

### Study design

The participants were randomly assigned to 1.5 mg of weekly subcutaneous dulaglutide or to the same volume of placebo.<sup>14</sup> They underwent scheduled visits after 2 weeks, 3 and 6 months and subsequently every 3 months for drug dispensing and every 6 months for a more detailed assessment.<sup>11,14</sup> The investigators were encouraged to promote a healthy lifestyle and defined targets for each cardiovascular risk factor, and they could add any glucose-lowering medication, apart from another GLP-1 RA or pramlintide, at their discretion, according to local guidelines.

### Outcomes

The primary endpoint was the first of a composite of nonfatal myocardial infarction, nonfatal stroke, and death from cardiovascular or unknown

causes (3-point major adverse cardiovascular outcomes, MACE). Three key secondary outcomes were analysed: (i) a composite clinical microvascular outcome, including retinopathy due to diabetes (defined as need for photocoagulation, anti-vascular endothelial growth factor therapy, or vitrectomy) or renal disease (defined as development of a urinary albumin-to-creatinine ratio of  $> 33.9$  mg/mmol in those with a lower baseline concentration, a sustained 30% or greater decline in eGFR based on two consecutive eGFR assessments or need for chronic renal replacement therapy); (ii) all-cause death; and (iii) heart failure requiring either hospital admission or an urgent visit requiring therapy.

### Ethics

The study complies with the Declaration of Helsinki, and the REWIND protocol was approved by research ethics boards at each site. All participants provided written informed consent. Data monitoring was carried out by an independent committee every 6 months.<sup>14</sup>

### Data management and statistical analyses

The characteristics of participants according to reported baseline metformin were summarized; categorical variables are reported as count and percentages with the corresponding odds ratios (ORs, i.e. the odds of being on metformin in the presence vs. the absence of the variable) while continuous variables are reported as mean and standard deviation with the corresponding ORs (i.e. the odds of being on metformin for every unit increase in the value of the continuous variable). Logistic regression was used to assess the univariable relationship between the baseline characteristics of interest and baseline metformin use. A multivariable logistic regression model was constructed considering all of the univariable predictors of baseline metformin with a *P*-value of  $< 0.05$  using backward elimination method with the alpha-level of 0.05.

The estimated effect of dulaglutide on the study outcomes in participants with and without baseline metformin use was evaluated according to the intention-to-treat principle and included all outcomes occurring on or after randomization in the analysis. Kaplan–Meier estimates were used to generate cumulative incidence risks and Cox proportional hazards models were used to estimate the hazard ratio (HR) and 95% confidence interval (CI) in each of subgroups of baseline metformin use. The interaction between dulaglutide and metformin use at baseline was assessed by including the subgroup and interaction term in the Cox model. The effect of dulaglutide on the primary outcome was also evaluated by means of an analysis of three subgroups in relation to glucose-lowering therapy at baseline: drug-naïve patients (neither on metformin nor on any other glucose drugs); patients on any glucose-lowering drug except metformin; and patients on metformin with or without any other glucose-lowering drug.

In addition, the Cox models were adjusted for the baseline characteristics identified in the multivariable logistic regression model.

To investigate whether the use of metformin during follow-up influenced the effect of dulaglutide on the four major outcomes (MACE, all-cause death, microvascular, and heart failure), the hazard of dulaglutide was re-estimated after adjusting for baseline metformin use and metformin use as a time-varying covariate (i.e. at the last visit before either the outcome or censorship).

## Results

### Patient characteristics

A total of 9901 participants were recruited between August 2011 and August 2014, of whom 4949 were randomized to dulaglutide

**Table 1** Baseline characteristics of patients with and without metformin treatment at baseline

|                                                   | Overall          | Metformin        | No metformin     | OR (95% CI) <sup>a</sup> | P-value <sup>a</sup> |
|---------------------------------------------------|------------------|------------------|------------------|--------------------------|----------------------|
| Randomized, n                                     | 9901             | 8037             | 1864             |                          |                      |
| Age (years), mean (SD)                            | 66.2 (6.53)      | 65.8 (6.34)      | 67.8 (7.05)      | 0.954 (0.947–0.961)      | <0.0001              |
| Females, n (%)                                    | 4589 (46.3)      | 3675 (45.7)      | 914 (49.0)       | 0.876 (0.792–0.969)      | 0.0099               |
| White ethnicity, n (%)                            | 7498 (75.7)      | 6065 (75.5)      | 1433 (76.9)      | 0.925 (0.821–1.042)      | 0.1995               |
| Current tobacco use, n (%)                        | 1407 (14.2)      | 1157 (14.4)      | 250 (13.4)       | 1.086 (0.937–1.258)      | 0.2712               |
| Cardiovascular event, n (%)                       | 2035 (20.6)      | 1585 (19.7)      | 450 (24.1)       | 0.777 (0.689–0.875)      | <0.0001              |
| Hypertension, n (%)                               | 9224 (93.2)      | 7474 (93.0)      | 1750 (93.9)      | 0.865 (0.702–1.066)      | 0.1730               |
| Prior heart failure, n (%)                        | 853 (8.6)        | 620 (7.7)        | 233 (12.5)       | 0.586 (0.499–0.688)      | <0.0001              |
| Diabetes duration (years), mean (SD)              | 10.5 (7.22)      | 10.6 (7.03)      | 10.2 (8.01)      | 1.009 (1.002–1.016)      | 0.0163               |
| Retinopathy due to diabetes, n (%)                | 891 (9.0)        | 720 (9.0)        | 171 (9.2)        | 0.979 (0.822–1.167)      | 0.8153               |
| HbA <sub>1c</sub> (%), mean (SD); mean (mmol/mol) | 7.34 (1.05); 57  | 7.35 (1.04); 57  | 7.30 (1.10); 56  | 1.054 (1.004–1.106)      | 0.0321               |
| eGFR < 60 (mL/min/1.73 m <sup>2</sup> ), n (%)    | 2199 (22.2)      | 1555 (19.3)      | 644 (34.5)       | 0.453 (0.405–0.506)      | <0.0001              |
| Albuminuria, n (%)                                | 3467 (35.0)      | 2786 (34.7)      | 681 (36.5)       | 0.896 (0.804–0.997)      | 0.0440               |
| Sulfonylurea, n (%)                               | 4552 (46.0)      | 3723 (46.3)      | 829 (44.5)       | 1.077 (0.974–1.192)      | 0.1490               |
| Insulin, n (%)                                    | 2363 (23.9)      | 1800 (22.4)      | 563 (30.2)       | 0.667 (0.596–0.746)      | <0.0001              |
| DPP4i, n (%)                                      | 564 (5.7)        | 456 (5.7)        | 108 (5.8)        | 0.978 (0.788–1.214)      | 0.8391               |
| Thiazolidinedione, n (%)                          | 168 (1.7)        | 97 (1.2)         | 71 (3.8)         | 0.309 (0.226–0.421)      | <0.0001              |
| Other glucose-lowering drugs, n (%)               | 32 (0.3)         | 0 (0.0)          | 32 (1.7)         | 0.000 (0.000–1E149)      | 0.9331               |
| Body mass index (kg/m <sup>2</sup> ), mean (SD)   | 32.3 (5.74)      | 32.4 (5.73)      | 31.8 (5.77)      | 1.019 (1.010–1.028)      | <0.0001              |
| Systolic BP (mm Hg), mean (SD)                    | 137 (16.8)       | 137 (16.8)       | 137 (16.9)       | 1.002 (0.999–1.005)      | 0.2322               |
| Diastolic BP (mm Hg), mean (SD)                   | 78.4 (9.83)      | 78.7 (9.75)      | 77.5 (10.1)      | 1.013 (1.007–1.018)      | <0.0001              |
| Heart rate (beats/min), mean (SD)                 | 71.5 (10.9)      | 71.7 (10.8)      | 70.4 (11.1)      | 1.011 (1.007–1.016)      | <0.0001              |
| LDL cholesterol (mmol/L), mean (SD)               | 2.56 (0.98)      | 2.52 (0.97)      | 2.72 (0.97)      | 0.815 (0.774–0.857)      | <0.0001              |
| Triglycerides (mmol/L), median (IQR)              | 1.60 (1.17–2.22) | 1.60 (1.18–2.22) | 1.57 (1.17–2.20) | 1.014 (0.970–1.061)      | 0.5328               |
| ACEi/ARB, n (%)                                   | 8068 (81.5)      | 6593 (82.0)      | 1475 (79.1)      | 1.204 (1.062–1.365)      | 0.0037               |
| Beta-blocker, n (%)                               | 4512 (45.6)      | 3652 (45.4)      | 860 (46.1)       | 0.972 (0.879–1.076)      | 0.5856               |
| Statin, n (%)                                     | 6547 (66.1)      | 5395 (67.1)      | 1152 (61.8)      | 1.262 (1.137–1.401)      | <0.0001              |
| Fibrate, n (%)                                    | 898 (9.1)        | 730 (9.1)        | 168 (9.0)        | 1.009 (0.846–1.202)      | 0.9245               |

ACEi/ARB, angiotensin converting enzyme inhibitors/angiotensin receptor blockers; BP, blood pressure; CI, confidence interval; DPP4i, Dipeptidyl Peptidase 4 inhibitors; eGFR, estimated glomerular filtration rate; IQR, interquartile range; OR, odds ratio; SD, standard deviation.

<sup>a</sup>Categorical variables are reported as count and percentages with the corresponding ORs (i.e. the odds of being on metformin in the presence vs. the absence of the variable) while continuous variables are reported as mean and standard deviation with the corresponding ORs (i.e. the odds of being on metformin for every unit increase in the value of the continuous variable).

and 4952 to placebo. At baseline, 8037 (81%) of the participants were prescribed metformin and 1864 (19%) were without metformin therapy, with similar proportions in the dulaglutide and placebo groups (*Take home figure*).

Patients' characteristics are presented in *Table 1*. Compared to patients with baseline metformin those without such treatment included a higher proportion of female participants (49% vs. 45.7%) and they were older (67.8 years old vs. 65.8), slightly less obese (BMI 31.8 vs. 32.4 kg/m<sup>2</sup>), with a higher proportion of previous cardiovascular events (24.1% vs. 19.7%), heart failure (12.5% vs. 7.7%), and renal disease (eGFR <60 mL/min/1.73 m<sup>2</sup> in 34.5% vs. 19.3%). Moreover, they had higher use of insulin (30.2% vs. 22.4%) and thiazolidinediones (3.8% vs. 1.2%) but a lower use of statins (61.8% vs. 67.1%) and renin-angiotensin system inhibitors (79.1% vs. 82.0%). The independent determinants of baseline metformin use included age, previous cardiovascular events, heart failure, diabetes duration, eGFR <60, insulin use, thiazolidinedione use, BMI, diastolic blood

pressure, heart rate, LDL cholesterol, renin-angiotensin aldosterone system inhibitors use, and use of statins.

## Outcome

During a median follow-up of 5.4 years (interquartile range 5.1–5.9), the primary outcome occurred in 976 (12%) participants with baseline metformin and 281 (15%) without metformin. As noted in *Table 2*, dulaglutide reduced the risk of the primary endpoint (MACE) with an HR of 0.88 (95% CI 0.79–0.99) in the entire REWIND cohort, with similar effects noted in participants who were and were not taking metformin at baseline (interaction *P* = 0.26). There were also similar effects according to baseline metformin use for the microvascular endpoint (interaction *P* = 0.12), all-cause death (interaction *P* = 0.81), and heart failure (interaction *P* = 0.85). Additional analyses confirmed the absence of any interaction between baseline metformin use and dulaglutide's effect on the components of MACE (*Supplementary material online, Table S1*), and between subgroups defined by the

**Table 2** Number, proportions, and annual incidence of events for each outcome in the total cohort and in the dulaglutide and placebo groups, respectively, in patients with and without metformin at baseline

|                       | Dulaglutide |             |        | Placebo     |              |        | HR (95% CI)         | P-value for interaction <sup>a</sup> |
|-----------------------|-------------|-------------|--------|-------------|--------------|--------|---------------------|--------------------------------------|
|                       | Subgroup, n | n (%)       | %/year | Subgroup, n | n (%)        | %/year |                     |                                      |
| MACE                  | 4949        | 594 (12.00) | 2.35   | 4952        | 663 (13.39)  | 2.66   | 0.882 (0.789–0.985) | 0.2598                               |
| Baseline metformin    | 4022        | 470 (11.70) | 2.28   | 4015        | 506 (12.60)  | 2.49   | 0.913 (0.805–1.035) |                                      |
| No baseline metformin | 927         | 124 (13.38) | 2.67   | 937         | 157 (16.76)  | 3.40   | 0.782 (0.618–0.989) |                                      |
| Microvascular         | 4949        | 910 (18.39) | 3.76   | 4952        | 1019 (20.58) | 4.31   | 0.869 (0.795–0.950) | 0.1168                               |
| Baseline metformin    | 4022        | 734 (18.25) | 3.72   | 4015        | 847 (21.10)  | 4.40   | 0.840 (0.761–0.927) |                                      |
| No baseline metformin | 927         | 176 (18.99) | 3.97   | 937         | 172 (18.36)  | 3.90   | 1.012 (0.820–1.248) |                                      |
| All-cause mortality   | 4949        | 536 (10.83) | 2.06   | 4952        | 592 (11.95)  | 2.29   | 0.897 (0.798–1.008) | 0.8115                               |
| Baseline metformin    | 4022        | 413 (10.27) | 1.95   | 4015        | 452 (11.26)  | 2.15   | 0.904 (0.791–1.033) |                                      |
| No baseline metformin | 927         | 123 (13.27) | 2.57   | 937         | 140 (14.94)  | 2.93   | 0.874 (0.686–1.114) |                                      |
| Heart failure         | 4949        | 213 (4.30)  | 0.83   | 4952        | 226 (4.56)   | 0.89   | 0.931 (0.772–1.123) | 0.8452                               |
| Baseline metformin    | 4022        | 162 (4.03)  | 0.77   | 4015        | 170 (4.23)   | 0.82   | 0.942 (0.759–1.168) |                                      |
| No baseline metformin | 927         | 51 (5.50)   | 1.08   | 937         | 56 (5.98)    | 1.20   | 0.901 (0.617–1.317) |                                      |

CI, confidence interval; HR, hazard ratio; MACE, major adverse cardiovascular events.

<sup>a</sup>Unadjusted P-value for interaction from Cox proportional hazards regression models.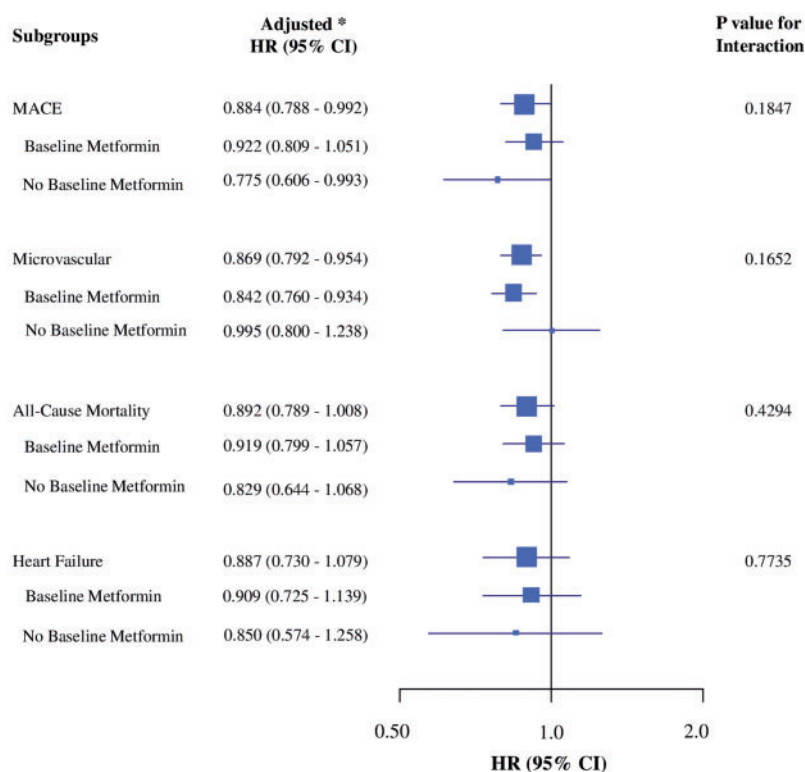\* Adjusted for: Age, previous cardiovascular events and heart failure, diabetes duration, eGFR < 60 ml/min/1.73m<sup>2</sup>, insulin use, thiazolidinedione use, BMI, diastolic BP, heart rate, LDL, ACEi/ARB use, statin use.**Figure 1** Cardiovascular outcomes, composite microvascular outcome, all-cause death and heart failure in participants by use of metformin at baseline, after adjusting for the independent determinants of metformin use. The size of each box is proportional to the number of events. ACEi/ARB, ACE inhibitors/angiotensin receptor blockers; BMI, body mass index; BP, blood pressure; CI, confidence interval; eGFR, estimated glomerular filtration rate; HR, hazard ratio; MACE, major adverse cardiovascular events.



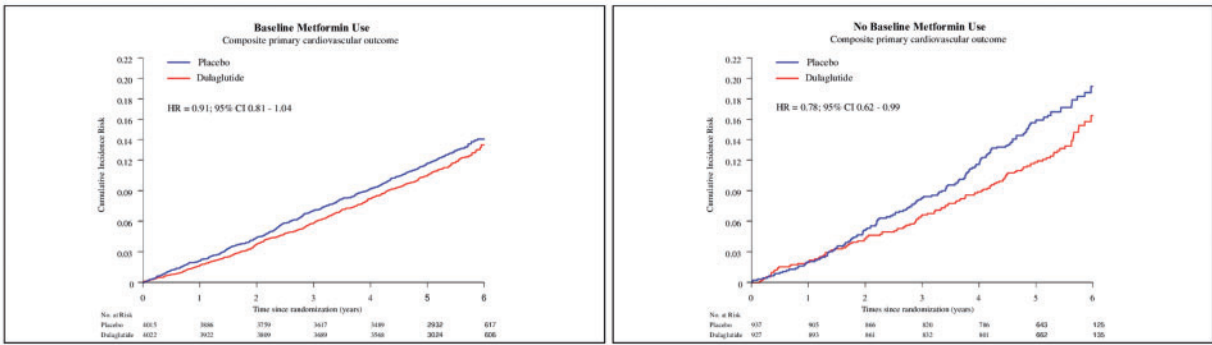

**Figure 2** Kaplan–Meier curves showing the cumulative incidence of the primary outcome in participants with baseline metformin (A) and without baseline metformin use (B). CI, confidence interval; HR, hazard ratio.

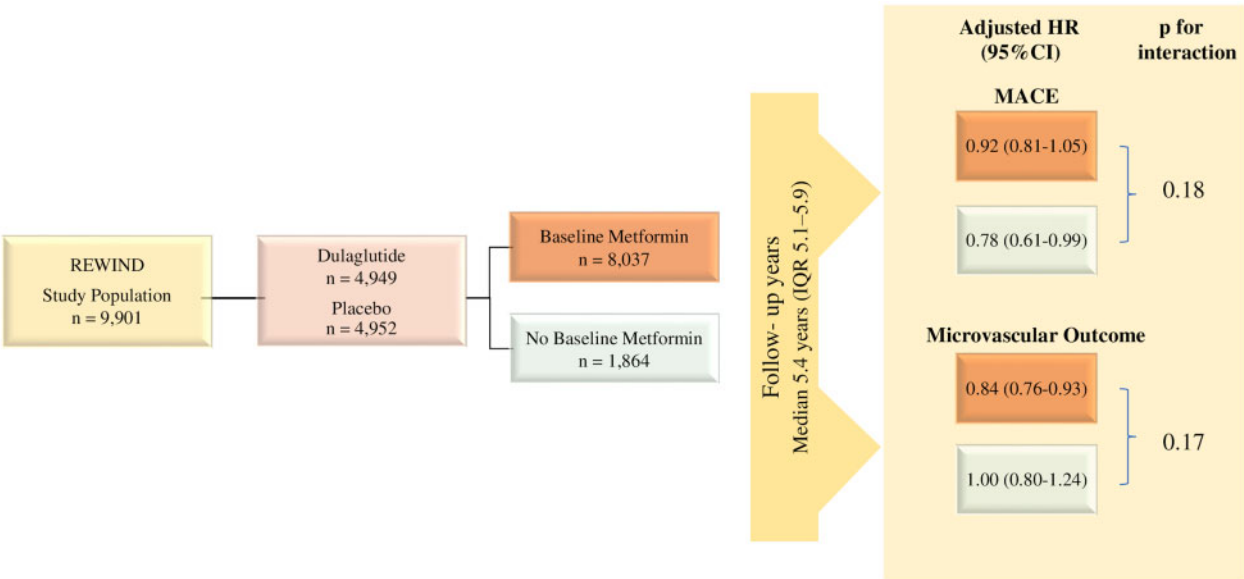

**Take home figure** In this *post hoc* analysis of the REWIND trial, the cardiovascular protective effect of glucagon-like peptide 1 receptor agonist Dulaglutide was unaffected by baseline metformin therapy in patients with type 2 diabetes at high cardiovascular risk or with established cardiovascular disease. CI, confidence interval; HR, hazard ratio; IQR, interquartile range; MACE, major adverse cardiovascular events.

type of glucose-lowering therapy (Supplementary material online, Table S2) and dulaglutide (interaction  $P = 0.53$ ). Individuals who were taking baseline metformin differed from those not on baseline metformin in several ways (Table 1). The effect of dulaglutide in the presence and absence of metformin was therefore also assessed after accounting for the independent determinants of metformin use listed above. As noted in Figure 1, the absence of any significant interaction (all interaction  $P$ -values  $> 0.1$ ) provides no support for any differential effect of dulaglutide

according to the baseline metformin use. In particular, there was no significant difference in the effect of dulaglutide on the primary outcome in patients with or without metformin at baseline [adjusted HR 0.92 (CI 0.81–1.05) vs. 0.78 (CI 0.61–0.99), respectively; interaction  $P = 0.18$ ]. The risk for the composite microvascular endpoint, all-cause death and heart failure was similar in patients treated with dulaglutide, irrespective of use of baseline metformin both before and after adjusting for the independent determinants of metformin use (all interaction  $P > 0.1$ ).

Kaplan–Meier curves for the primary MACE outcome in people with baseline metformin are shown in *Figure 2A*, whereas the corresponding curves for people without baseline metformin are shown in *Figure 2B*.

The effect of dulaglutide on the study outcomes was not influenced by the post-randomization use of metformin ([Supplementary material online, Table S3](#)).

## Discussion

This *post hoc* analysis shows that the cardiovascular and microvascular outcomes within the REWIND trial were similar in people who were and were not taking metformin at baseline. Indeed, the absence of any evidence of interaction between dulaglutide use and metformin means that the best estimate of the effect of the intervention on these outcomes is the overall effect (e.g. HR 0.88 for MACE). This finding and the absence of an interaction after adjusting for the independent determinants of metformin use at baseline and the absence of any interaction with respect to the other key outcomes provide further support for the hypothesis that on these outcomes are consistent regardless of baseline metformin therapy. Two additional analyses further strengthened the present findings. The first showed the absence of interaction when subgrouping the participants in those who were drug naive, those who received any glucose-lowering therapy except metformin, and those taking metformin. The second one showed that post-randomization changes in metformin use did not impact the effect of dulaglutide on study outcomes.

Considering the lack of a CVOT investigating the effect of metformin vs. placebo on MACE, a subgroup analysis of a superiority randomized controlled trial represents a reasonable tool to assess the influence of metformin therapy on the effect of novel antihyperglycaemic agents and to investigate whether such agents maintain their cardioprotective benefit in patients who, by some reason, are not prescribed metformin.<sup>11,14–16</sup> In REWIND, the large dataset, the broad inclusion criteria comprising both people at risk for and with established CVD and the superiority trial nature allow insight in the cardiovascular risk reduction in a heterogeneous group of patients with type 2 diabetes. In accordance with the present results, a recent *post hoc* analysis of the Liraglutide Effect and Action in Diabetes: Evaluation of Cardiovascular Outcome Results (LEADER) trial identified no clear heterogeneity in the cardiovascular efficacy of the GLP-1 RA liraglutide in relation to the background use of metformin.<sup>17</sup> Similarly, participants with and without metformin at baseline in the Albiglutide and cardiovascular outcomes in patients with type 2 diabetes and established CVD (Harmony Outcomes) trial had a consistent beneficial effect of the GLP-1 RA albiglutide on the primary composite cardiovascular outcome. This last report was, however, limited to a description of the primary outcome in prespecified subgroups, i.e. without any descriptions of or adjustments for dissimilarities in patients with and without baseline metformin.<sup>10</sup>

The mechanisms responsible for the cardiovascular benefits of GLP-1 RAs have not been fully elucidated.<sup>18</sup> Effects on glycaemic control, weight, lipid profile, blood pressure control, platelet function, and endothelial changes leading to improved myocardial perfusion have been shown.<sup>19–21</sup> Nevertheless, to assess the specific contribution of each action to the decrease in cardiovascular risk and to compare it to the respective metformin action would be

impossible given the nature of the REWIND trial. Therefore, analyses like the present might be the most clinically insightful, while further mechanistic speculation on the present results would be inadequate.<sup>15,18</sup>

This study has some limitations. First, the study population is a selected trial cohort of people with type 2 diabetes at high cardiovascular risk or with established CVD that may not be fully representative of a wider population of such patients. However, to assess the generalizability of different CVOTs results, a recent analysis compared the key characteristics of participants of GLP-1 RAs CVOTs to a reference American population who matched the specific entry criteria: encouragingly, the REWIND population resulted as the most representative.<sup>22</sup> Second, REWIND was not specifically designed to assess difference between groups according to baseline therapy; therefore, these results should be considered indicative rather than proof of evidence. This is, at least partly, addressed by the absence of any interaction, even after adjusting for independent determinants of metformin use at baseline. The consistent results found for the secondary outcomes should also be interpreted as quality indicators of such sensitivity. Nevertheless, it is possible that other baseline characteristics were not included in the models. A third limitation is the relatively small proportion of participants without metformin at baseline, 19%, to a certain extent decreasing the power of the present analysis. A final limitation was that the possible effect of the other glucose-lowering medications taken by study participants was not characterized.

In conclusion, the present data favour the hypothesis that the benefit of the GLP-1 receptor agonist dulaglutide is unaffected by the use of baseline metformin in a population of patients with type 2 diabetes at high cardiovascular risk or with established CVD.

## Data availability

The data sharing policy for this work is detailed in Appendix 1.

## Supplementary material

[Supplementary material](#) is available at *European Heart Journal* online.

## Authors' contributions

G.F., H.C.G., and L.R. agreed to be accountable for all aspects of work ensuring integrity and gave final approval of publication. G.F., H.C.G., L.D., and L.R. contributed to conception, design, data acquisition and analyses, and interpretation of data. G.F. drafted the first manuscript that was critically reviewed by H.C.G., L.D., and L.R. Every other author led the trial overall or in their respective countries and every author critically reviewed and revised the article prior to submission.

## Statement of assistance

The authors are grateful to the REWIND investigators, coordinators, committee members, and staff. Their contributions, as well as those of ICON Clinical Research, which provided site management and collected the data, are gratefully acknowledged.

## Guarantor's statement

Prof. Lars Rydén is the guarantor of this work and, as such, had full access to all the data in the study and takes responsibility for the integrity of the data and the accuracy of the data analysis.

## Funding

The REWIND trial was funded by Eli Lilly and Company.

**Conflict of interest:** G.F. has no conflict of interest to report. H.C.G. holds the McMaster-Sanofi Population Health Institute Chair in Diabetes Research and Care. He reports research grants from Eli Lilly, AstraZeneca, Merck, Novo Nordisk, and Sanofi; honoraria for speaking from AstraZeneca, Boehringer Ingelheim, Eli Lilly, Novo Nordisk, and Sanofi; and consulting fees from Abbott, AstraZeneca, Boehringer Ingelheim, Eli Lilly, Merck, Novo Nordisk, Janssen, Sanofi, and Kowa. H.M.C. reports research grants from Eli Lilly, AstraZeneca, Regeneron, Pfizer, Roche, Sanofi, and Novo Nordisk; honoraria for speaking from Eli Lilly and Regeneron; consulting fees from Eli Lilly, Novartis, Regeneron, Sanofi, and Novo Nordisk; and shares in Bayer and Roche. R.D. reports research grants from the Population Health Research Institute, Duke Clinical Research Institute, Montreal Health Innovations Coordinating Center, CPC Clinical Research, DalCor, Amgen, Lepetit, and Cirius; honoraria for speaking from Sanofi; and consulting fees from Sanofi and Cirius. M.L. is employed by Eli Lilly, own stock, and has a patent pending. M.C.R. reports grants to his institution from Eli Lilly, AstraZeneca, and Novo Nordisk; honoraria for consulting from Adocia, DalCor, GlaxoSmithKline, and Theracos; and honoraria for speaking from Sanofi. F.L. reports grants from the Population Health Research Institute. L.A.L. reports grants from Eli Lilly, AstraZeneca, Boehringer Ingelheim, GSK, Janssen, Novo Nordisk, and Sanofi; honoraria for speaking from Eli Lilly, AstraZeneca, Boehringer Ingelheim, Janssen, Merck, Novo Nordisk, Sanofi, and Servier; and consulting fees from Eli Lilly, AstraZeneca, Boehringer Ingelheim, Janssen, Merck, Novo Nordisk, Sanofi, and Servier. P.L.-J. reports honoraria for speaking from Sanofi, Amgen, Merck, Boehringer Ingelheim, AstraZeneca, and Abbott. J.E.S. reports grants from Eli Lilly and consulting fees or speaking honoraria from AstraZeneca, Eli Lilly, Novo Nordisk, Sanofi, Mylan, Boehringer Ingelheim, Merck Sharp and Dohme, and Abbott. L.R. reports grants from the Swedish Heart Lung Foundation, Stockholm County Council, and Boehringer Ingelheim and fees for consulting and speaking from Boehringer Ingelheim, Novo Nordisk, Eli Lilly, Merck, and Bayer. All other authors declare no competing interests.

## References

1. Rawshani A, Rawshani A, Franzén S, Eliasson B, Svensson A-M, Miftaraj M, McGuire DK, Sattar N, Rosengren A, Gudbjörnsdóttir S. Mortality and cardiovascular disease in type 1 and type 2 diabetes. *N Engl J Med* 2017;**376**:1407–1418.
2. Standl E, Schnell O. Treatment paradigm shifting implications of recent cardiovascular outcome trials: core insights on the brink of the 2020ies. *Diabetes Res Clin Pract* 2020;**161**:108054.
3. Cosentino F, Grant PJ, Aboyans V, Bailey CJ, Ceriello A, Delgado V, Federici M, Filippatos G, Grobbee DE, Hansen TB, Huikuri HV, Johansson I, Jüni P, Lettino M, Marx N, Mellblin LG, Östgren CJ, Rocca B, Roffi M, Sattar N, Seferović PM, Sousa-Uva M, Valensi P, Wheeler DC, Piepoli MF, Birkeland KI, Adamopoulos S, Ajjan R, Avogaro A, Baigent C, Brodmann M, Bueno H, Ceconi C, Chioncel O, Coats A, Collet J-P, Collins P, Cosyns B, Di Mario C, Fisher M, Fitzsimons D, Halvorsen S, Hansen D, Hoes A, Holt RIG, Home P, Katus HA, Khunti K, Komajda M, Lambrinou E, Landmesser U, Lewis BS, Linde C, Lorusso R, Mach F, Mueller C, Neumann F-J, Persson F, Petersen SE, Petronio AS, Richter DJ, Rosano GMC, Rossing P, Rydén L, Shlyakhto E, Simpson IA, Touyz RM, Wijns W, Wilhelm M, Williams B, Aboyans V, Bailey CJ, Ceriello A, Delgado V, Federici M, Filippatos G, Grobbee DE, Hansen TB, Huikuri HV, Johansson I, Jüni P, Lettino M, Marx N, Mellblin LG, Östgren CJ, Rocca B, Roffi M, Sattar N, Seferović PM, Sousa-Uva M, Valensi P, Wheeler DC, Windecker S, Aboyans V, Baigent C, Collet J-P, Dean V, Delgado V, Fitzsimons D, Gale CP, Grobbee DE, Halvorsen S, Hindricks G, Iung B, Jüni P, Katus HA, Landmesser U, Leclercq C, Lettino M, Lewis BS, Merkely B, Mueller C, Petersen SE, Petronio AS, Richter DJ, Roffi M, Shlyakhto E, Simpson IA, Sousa-Uva M, Touyz RM, Zelveian PH, Scherr D, Jahangirov T, Lazareva I, Shivalkar B, Naser N, Gruel I, Milicic D, Petrou PM, Linhart A, Hildebrandt P, Hasan-Ali H, Marandi T, Lehto S, Mansourati J, Kurashvili R, Siasos G, Lengyel C, Thrainsdóttir IS, Aronson D, Di Lenarda A, Rasoova A, Ibrahim P, Abilova S, Trusinskis K, Saade G, Benjamin H, Petrulioniene Z, Banu C, Magri CJ, David L, Boskovic A, Alami M, Liem AH, Bosevski M, Svingen GFT, Janion M, Gavina C, Vinereanu D, Nedogoda S, Mancini T, Ilic MD, Fabryova L, Frasz Z, Jiménez-Navarro MF, Norhammar A, Lehmann R, Mourali MS, Ural D, Nesukay E, Chowdhury TA; ESC Scientific Document Group. 2019 ESC Guidelines on diabetes, pre-diabetes, and cardiovascular diseases developed in collaboration with the EASD. *Eur Heart J* 2020;**41**: 255–323.
4. Zinman B, Wanner C, Lachin JM, Fitchett D, Bluhmki E, Hantel S, Mattheus M, Devins T, Johansen OE, Woerle HJ, Broedl UC, Inzucchi SE. Empagliflozin, cardiovascular outcomes, and mortality in type 2 diabetes. *N Engl J Med* 2015;**373**: 2117–2128.
5. Neal B, Perkovic V, Mahaffey KW, de Zeeuw D, Fulcher G, Erondou N, Shaw W, Law G, Desai M, Matthews DR. Canagliflozin and cardiovascular and renal events in type 2 diabetes. *N Engl J Med* 2017;**377**:644–657.
6. Wiviott SD, Raz I, Bonaca MP, Mosenzon O, Kato ET, Cahn A, Silverman MG, Zelniker TA, Kuder JF, Murphy SA, Bhatt DL, Leiter LA, McGuire DK, Wilding JPH, Ruff CT, Gause-Nilsson IAM, Fredriksson M, Johansson PA, Langkilde AM, Sabatine MS. Dapagliflozin and cardiovascular outcomes in type 2 diabetes. *N Engl J Med* 2019;**380**:347–357.
7. Marso SP, Daniels GH, Brown-Frandsen K, Kristensen P, Mann JF, Nauck MA, Nissen SE, Pocock S, Poulter NR, Ravn LS, Steinberg WM, Stockner M, Zinman B, Bergenstal RM, Buse JB. Liraglutide and cardiovascular outcomes in type 2 diabetes. *N Engl J Med* 2016;**375**:311–322.
8. Marso SP, Bain SC, Consoli A, Eliaschewitz FG, Jodar E, Leiter LA, Lingvay I, Rosenstock J, Seufert J, Warren ML, Woo V, Hansen O, Holst AG, Pettersson J, Vilsboll T, Warren ML, Bain SC. Oral semaglutide and cardiovascular outcomes in patients with type 2 diabetes. *N Engl J Med* 2016;**375**:1834–1844.
9. Husain M, Birkenfeld AL, Donsmark M, Duncan K, Eliaschewitz FG, Franco DR, Jeppesen OK, Lingvay I, Mosenzon O, Pedersen SD, Tack CJ, Thomsen M, Vilsboll T, Warren ML, Bain SC. Oral semaglutide and cardiovascular outcomes in patients with type 2 diabetes. *N Engl J Med* 2019;**381**:841–851.
10. Hernandez AF, Green JB, Janmohamed S, D'Agostino RB, Granger CB, Jones NP, Leiter LA, Rosenberg AE, Sigmon KN, Somerville MC, Thorpe KM, McMurray JJV, Del Prato S, Del Prato S, McMurray JJV, D'Agostino RB, Granger CB, Hernandez AF, Janmohamed S, Leiter LA, Califf RM, Holman R, DeMets D, Riddle M, Goodman S, McGuire D, Alexander K, Devore A, Melloni C, Patel C, Kong D, Bloomfield G, Roe M, Tricoci P, Harrison R, Lopes R, Mathews R, Mehta R, Schuyler Jones W, Vemulapalli S, Povsic T, Eapen Z, Dombrowski K, Kolls B, Jordan D, Ambrosy A, Greene S, Mandawat A, Shavadia J, Cooper L, Sharma A, Guimaraes P, Friedman D, Wilson M, Endsley P, Gentry T, Collier J, Perez K, James K, Roush J, Pope C, Howell C, Johnson M, Bailey M, Cole J, Akers T, Vandyne B, Thomas B, Rich J, Bartone S, Beaulieu G, Brown K, Chau T, Christian T, Coker R, Greene D, Haddock T, Jenkins W, Haque G, Marquess M, Pesarchick J, Rethaford R, Stone A, Al Kawas F, Anderson M, Enns R, Sinay I, Mathieu C, Yordanov V, Hramiak I, Haluzik M, Galatius S, Guerci B, Nauck M, Migdalis I, Tan CBK, Kocsis G, Giaccari A, Lee MK, Muñoz EGC, Cornel J, Birkeland K, Pinto M, Tirador L, Olesinska-Mader M, Shestakova M, Distiller L, Lopez-Sendon J, Eliasson B, Chiang C-E, Srimachota S, Mankovsky B, Bethel MA, Duncan K, Kosiborod M, Alvarisqueta A, Baldovino J, Besada D, Caella P, Cantero MC, Castaño P, Chertkoff A, Cuadrado J, De Loreda L, Dominguez A, Español MV. Albiglutide and cardiovascular outcomes in patients with type 2 diabetes and cardiovascular disease (Harmony Outcomes): a double-blind, randomised placebo-controlled trial. *Lancet* 2018;**392**:1519–1529.
11. Gerstein HC, Colhoun HM, Dagenais GR, Diaz R, Lakshmanan M, Pais P, Probstfield J, Riesmeyer JS, Riddle MC, Rydén L, Xavier D, Atisio CM, Dyal L, Hall S, Rao-Melacini P, Wong G, Avezum A, Basile J, Chung N, Conget I, Cushman WC, Franek E, Hancu N, Hanefeld M, Holt S, Jansky P, Keltai M, Lanás F, Leiter LA, Lopez-Jaramillo P, Cardona Munoz EG, Pirags V, Pogoseva N, Raubenheimer PJ, Shaw JE, Sheu WH-H, Temelkova-Kurktschiev T, Abella M, Alebuena A, Almagro S, Amoroso E, Anadon P, Andreu E, Aristimuño G, Arzadun M, Barbieri M, Barcudi R, Bartolacci I, Bolobanich G, Bordonava A, Bustamante Labarta M, Bustos B, Caccavo A, Camino A, Cantero M, Carignano M, Cartasegna L, Cipullo M, Commendatore V, Conosciuto V, Costamagna O, Crespo C, Cuello J, Cuneo C, Cusimano S, Dean S, Ditturo C, Dominguez A, Farah M, Fernandez A, Fernandez F, Ferrari A, Flammia P, Fuentealba J, Gallardo



- KB, Garcia C, Garcia Duran R, Garrido M, Gavicola R, Gerbaudo C, Gilli G, Giotto AP, Godoy Bolzán P, Gomez Vilamajo O, Guerlloy F, Guridi C, Gutierrez Garrido N, Temelkova-Kurktschiev T. Dulaglutide and cardiovascular outcomes in type 2 diabetes (REWIND): a double-blind, randomised placebo-controlled trial. *Lancet* 2019;**394**:121–130.
12. Buse JB, Wexler DJ, Tsapas A, Rossing P, Mingrone G, Mathieu C, D'Alessio DA, Davies MJ. 2019 update to: management of hyperglycemia in type 2 diabetes, 2018. A consensus report by the American Diabetes Association (ADA) and the European Association for the Study of Diabetes (EASD). *Diabetes Care* 2020; **43**: 487–493.
13. Inzucchi SE, Fitchett D, Jurišić-Eržen D, Woo V, Hantel S, Janista C, Kaspers S, George JT, Zinman B; on behalf of the EMPA-REG OUTCOME® Investigators. Are the cardiovascular and kidney benefits of empagliflozin influenced by baseline glucose-lowering therapy? *Diabetes Obes Metab* 2020;**22**:631–639.
14. Gerstein HC, Colhoun HM, Dagenais GR, Díaz R, Lakshmanan M, Pais P, Probstfield J, Riddle MC, Ryden L, Xavier D, Atisso CM, Avezum A, Basile J, Chung N, Conget I, Cushman WC, Franek E, Hancu N, Hanefeld M, Holt S, Jansky P, Keltai M, Lanas F, Leiter LA, Lopez-Jaramillo P, Cardona-Munoz EG, Pirags V, Pogossova N, Raubenheimer PJ, Shaw J, Sheu WH, Temelkova-Kurktschiev T, on behalf of the REWIND Trial Investigators. Design and baseline characteristics of participants in the Researching cardiovascular Events with a Weekly INcretin in Diabetes (REWIND) trial on the cardiovascular effects of dulaglutide. *Diabetes Obes Metab* 2018;**20**:42–49.
15. Ferrannini E, DeFronzo RA. Impact of glucose-lowering drugs on cardiovascular disease in type 2 diabetes. *Eur Heart J* 2015;**36**:2288–2296.
16. Griffin SJ, Leaver JK, Irving GJ. Impact of metformin on cardiovascular disease: a meta-analysis of randomised trials among people with type 2 diabetes. *Diabetologia* 2017;**60**:1620–1629.
17. Crowley MJ, McGuire DK, Alexopoulos AS, Jensen TJ, Rasmussen S, Saeveid HA, Verma S, Buse JB. Effects of liraglutide on cardiovascular outcomes in type 2 diabetes patients with and without baseline metformin use: post hoc analyses of the LEADER trial. *Diabetes Care* 2020;**43**:e108–e110.
18. Rizzo M, Nikolic D, Patti AM, Mannina C, Montalto G, McAdams BS, Rizvi AA, Cosentino F. GLP-1 receptor agonists and reduction of cardiometabolic risk: potential underlying mechanisms. *Biochim Biophys Acta Mol Basis Dis* 2018;**1864**: 2814–2821.
19. Ban K, Noyan-Ashraf MH, Hoefer J, Bolz SS, Drucker DJ, Husain M. Cardioprotective and vasodilatory actions of glucagon-like peptide 1 receptor are mediated through both glucagon-like peptide 1 receptor-dependent and -independent pathways. *Circulation* 2008;**117**:2340–2350.
20. Sposito AC, Berwanger O, de Carvalho LSF, Saraiva JFK. GLP-1RAs in type 2 diabetes: mechanisms that underlie cardiovascular effects and overview of cardiovascular outcome data. *Cardiovasc Diabetol* 2018;**17**:157.
21. Schnell O, Ryden L, Standl E, Ceriello A, on behalf of the D&CVD EASD Study Group. Updates on cardiovascular outcome trials in diabetes. *Cardiovasc Diabetol* 2017;**16**:128.
22. Boye KS, Riddle MC, Gerstein HC, Mody R, Garcia-Perez LE, Karanikas CA, Lage MJ, Riesmeyer JS, Lakshmanan MC. Generalizability of glucagon-like peptide-1 receptor agonist cardiovascular outcome trials to the overall type 2 diabetes population in the United States. *Diabetes Obes Metab* 2019;**21**:1299–1304.
